# Supplementary material for: Photoelectrochemical immunoassay of alpha-fetoprotein based on a SnO2/In2S3 heterojunction and an enzyme-catalyzed precipitation strategy
Source: Royal Society of Chemistry journal article supplement (doi:10.1039/d3sd00105a), 2023-01-01
Supplement: d3sd00105a1.pdf [file d3sd00105a1.pdf]

## **Electronic Supplementary Material for**

### **Photoelectrochemistry immunoassay of alpha-fetoprotein based on a SnO<sub>2</sub>/In<sub>2</sub>S<sub>3</sub> heterojunction and an enzyme-catalyzed precipitation strategy**

Lu Li, Yaqing Weng, Chenglong Sun, Yueyi Peng\*, and Qingji Xie\*

Key Laboratory of Chemical Biology & Traditional Chinese Medicine Research (Ministry of Education of China), College of Chemistry and Chemical Engineering, Hunan Normal University, Changsha 410081, China. E-mail: xiejq@hunnu.edu.cn, pengyueyi@hunnu.edu.cn.

## Contents

|                              |             |
|------------------------------|-------------|
| <b>Reagents</b> .....        | <b>S-3</b>  |
| <b>Instrumentation</b> ..... | <b>S-4</b>  |
| <b>Fig. S1</b> .....         | <b>S-5</b>  |
| <b>Fig. S2</b> .....         | <b>S-6</b>  |
| <b>Fig. S3</b> .....         | <b>S-7</b>  |
| <b>Fig. S4</b> .....         | <b>S-8</b>  |
| <b>Fig. S5</b> .....         | <b>S-9</b>  |
| <b>Fig. S6</b> .....         | <b>S-11</b> |
| <b>Table S1</b> .....        | <b>S-12</b> |
| <b>Table S2</b> .....        | <b>S-13</b> |
| <b>References</b> .....      | <b>S-14</b> |

## Reagents

Tin chloride pentahydrate ( $\text{SnCl}_4 \cdot 5\text{H}_2\text{O}$ ), citric acid (CA), indium chloride tetrahydrate ( $\text{InCl}_3 \cdot 4\text{H}_2\text{O}$ ), chitosan (CS), cerium nitrate hexahydrate ( $\text{Ce}(\text{NO}_3)_3 \cdot 6\text{H}_2\text{O}$ ), 3-amino-9-ethylcarbazole (AEC), L-cysteine (L-Cys), hydrogen peroxide ( $\text{H}_2\text{O}_2$ ), methanol, hydrochloric acid (HCl), ascorbic acid (AA), sodium hydroxide (NaOH), potassium dihydrogen phosphate ( $\text{KH}_2\text{PO}_4$ ) and dipotassium hydrogen phosphate ( $\text{K}_2\text{HPO}_4$ ) were purchased from Sinopharm (Shanghai, China). 3-Aminopropyltriethoxysilane (APTES,  $\geq 99.5\%$  purity), N-hydroxy succinimide (NHS), 1-ethyl-3-(3-dimethylaminopropyl) carbodiimide (EDC) and glutaraldehyde (GLD) were purchased from Sigma-Aldrich. The above reagents are of analytical grade or higher purity.

AFP (Ag), AFP antibody and cytokeratin 19 fragment 21-1 (CYFRA21-1) were purchased from Shanghai Lingchao Biotechnology Co., Ltd. Immunoglobulin G (IgG), carcinoembryonic antigen (CEA) and procalcitonin (PCT) were purchased from Beijing Bioss Biological Co. The FTO conductive glass was obtained from Zhuhai Kaivo Optoelectronic Technology Co. The buffers used for PEC immunoassay and rinse were 0.100 M phosphate buffer (pH 7.40, 0.100 M  $\text{KH}_2\text{PO}_4$ - $\text{K}_2\text{HPO}_4$ ) and 0.0100 M phosphate buffer, respectively. Milli-Q ultrapure water (Millipore,  $\geq 18 \text{ M}\Omega \text{ cm}$ ) was employed throughout.

## **Instrumentation**

The PEC tests were carried out on an electrochemical workstation (ZENNIUM, ZAHNER-elektrik GmbH & Co. KG, Germany) with a PEC unit (CIMPS, PP211, ZAHNER-elektrik GmbH & Co. KG, Germany). The xenon lamp (WLC02, ZAHNER-elektrik GmbH & Co. KG, Germany) with visible light filter (400-700 nm) was used as the light source (100 mW cm<sup>-2</sup>). Cyclic voltammetry (CV), electrochemical impedance spectroscopy (EIS) and Mott-Schottky plot (M-S plot) experiments were carried out on a CHI660E electrochemical workstation (Shanghai Chenhua Instrument Co., Ltd.). Scanning electron microscopy (SEM) characterization was performed on a FEI Helios NanoLab 600i scanning electron microscope with an Oxford energy dispersive X-ray spectroscopy (EDS) analysis detector for elemental analysis. TECNAI F-30 transmission electron microscopy (TEM) instrument was used for the ultramicroscopic characterization of materials. Ultima IV X-ray diffractometry (XRD) was used for physical phase analysis. The ultraviolet-visible diffuse reflectance spectra (UV-vis DRS, with BaSO<sub>4</sub> as a reference) was recorded on a UV-2600i UV-vis spectrophotometer. FT-IR spectrum was collected on a Shimadzu IRTracer 100 Fourier transform infrared (FT-IR) spectrophotometer (KBr pellet). UV-vis absorption spectra were collected on a UV-2600i ultraviolet-visible spectrophotometer. The immune-electrode was used as the working electrode at an applied bias of 0.05 V vs SCE, a Pt disk as the counter electrode and a saturated calomel electrode as the reference electrode.

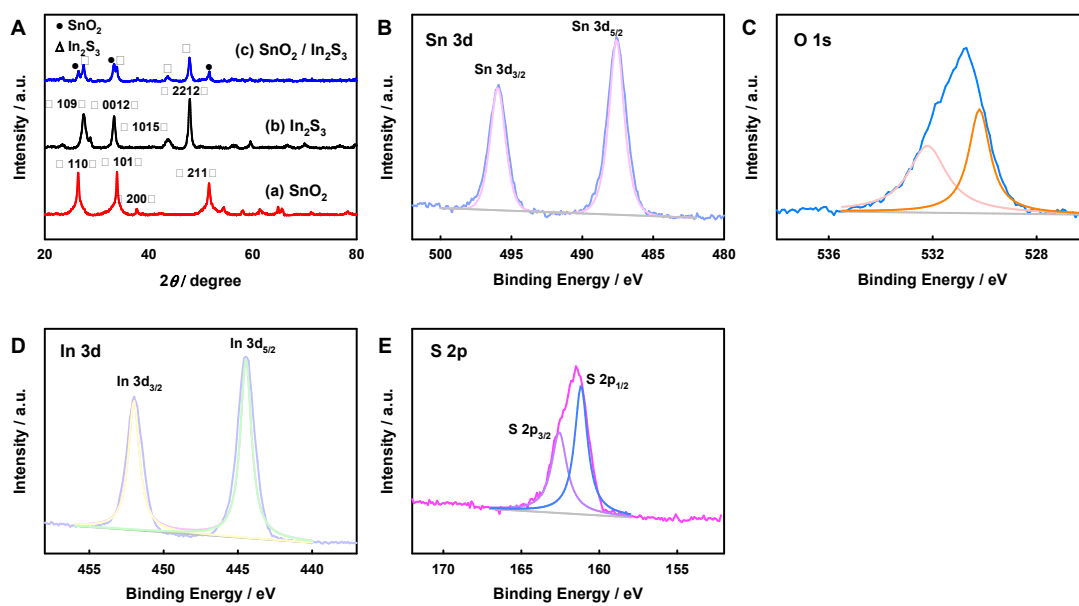

**Fig. S1** (A) XRD patterns of SnO<sub>2</sub> (a), In<sub>2</sub>S<sub>3</sub> (b) and SnO<sub>2</sub>/In<sub>2</sub>S<sub>3</sub> (c). XPS high-resolution spectra of (B) Sn 3d, (C) O 1s, (D) In 3d and (E) S 2p.

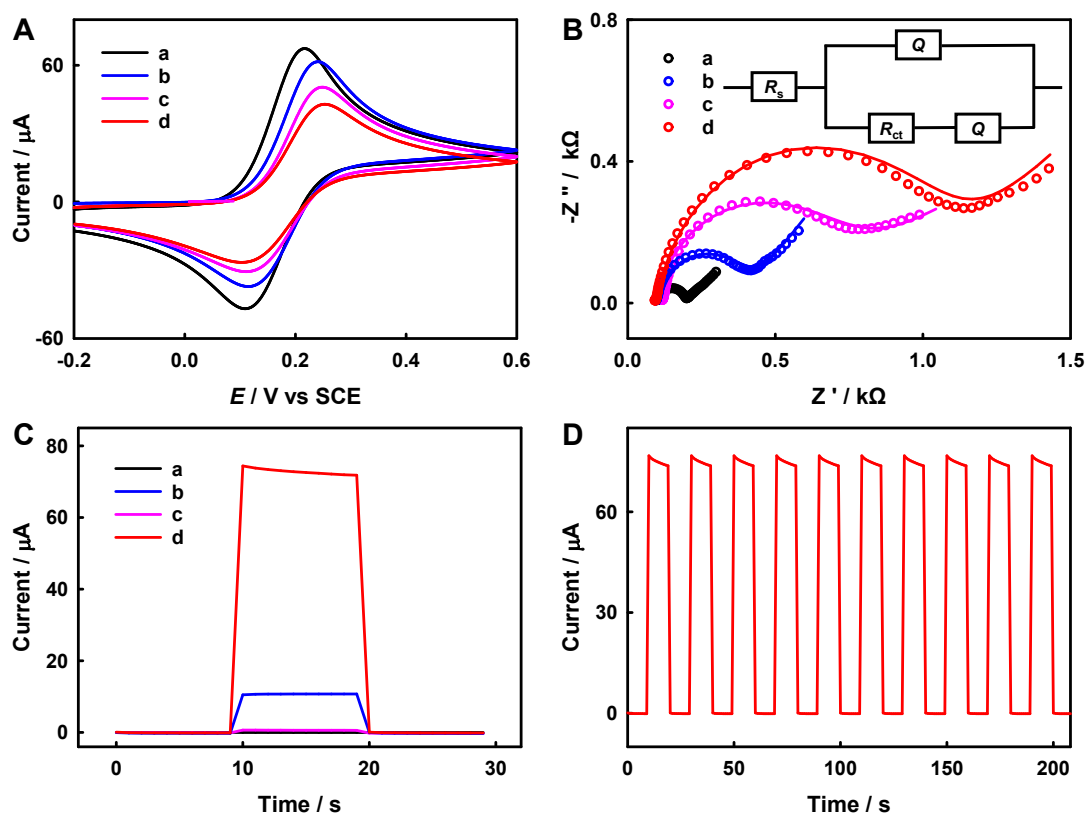

**Fig. S2** (A) CV, (B) EIS, (C) photocurrent responses on (a) FTO, (b)  $\text{In}_2\text{S}_3/\text{FTO}$ , (c)  $\text{SnO}_2/\text{FTO}$  and (d)  $\text{SnO}_2/\text{In}_2\text{S}_3/\text{FTO}$ , and (D) Stability of  $\text{SnO}_2/\text{In}_2\text{S}_3/\text{FTO}$  photoanode. CV scan rate:  $50 \text{ mV s}^{-1}$ . EIS experiment:  $100 \text{ kHz} \sim 0.01 \text{ Hz}$ ,  $0.20 \text{ V}$ ,  $200 \text{ s}$  resting time, circle: experimental value; curve: fitted to a modified Randles equivalent circuit (inset). Photocurrent experiment: PBS (pH 7.40) containing  $0.05 \text{ M AA}$  at  $0.05 \text{ V vs SCE}$ .

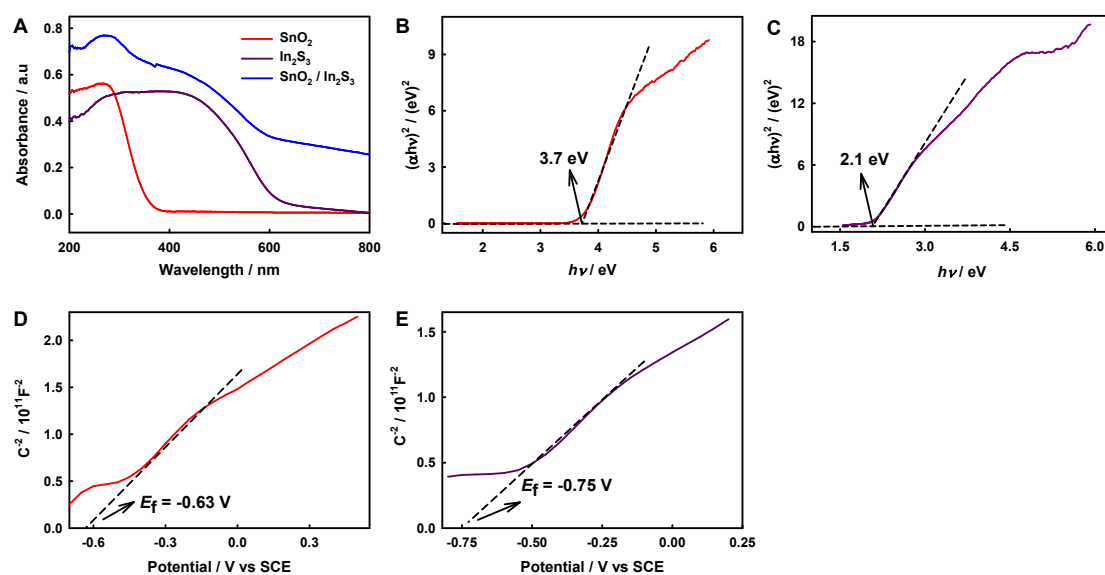

**Fig. S3** (A) UV-vis DRS of SnO<sub>2</sub>, In<sub>2</sub>S<sub>3</sub> and SnO<sub>2</sub>/In<sub>2</sub>S<sub>3</sub>. Tauc plots of (B) SnO<sub>2</sub> and (C) In<sub>2</sub>S<sub>3</sub>.

M-S plots of (D) SnO<sub>2</sub> and (E) In<sub>2</sub>S<sub>3</sub>. Mott-Schottky experiment: 0.2 M aqueous Na<sub>2</sub>SO<sub>4</sub>,

1000 Hz. The band gap ( $E_g$ ) of a semiconductor material can be calculated according to the

UV-vis DRS and the Tauc equation<sup>1</sup>,  $ahv = A(hv - E_g)^n$ , where  $a$  is the absorption coefficient,

$h$  is Planck's constant ( $6.63 \times 10^{-34}$  J s),  $\nu$  is the incident photon frequency ( $s^{-1}$ ),  $E_g$  is the

absorption band gap (in eV),  $A$  is a constant, and the parameter  $n$  is related to different types

of electronic transitions ( $n = 1/2, 2, 3/2$  or  $3$  for directly allowed, indirectly allowed, directly

forbidden and indirectly forbidden transitions, respectively)<sup>2</sup>. Both SnO<sub>2</sub> and In<sub>2</sub>S<sub>3</sub> are direct

semiconductor<sup>3, 4</sup>.  $(ahv)^2$  is plotted against  $hv$ . From the intercept point at  $y = 0$ , it can be

deduced that the  $E_g$  values are 3.7 eV for SnO<sub>2</sub> and 2.1 eV for In<sub>2</sub>S<sub>3</sub>.

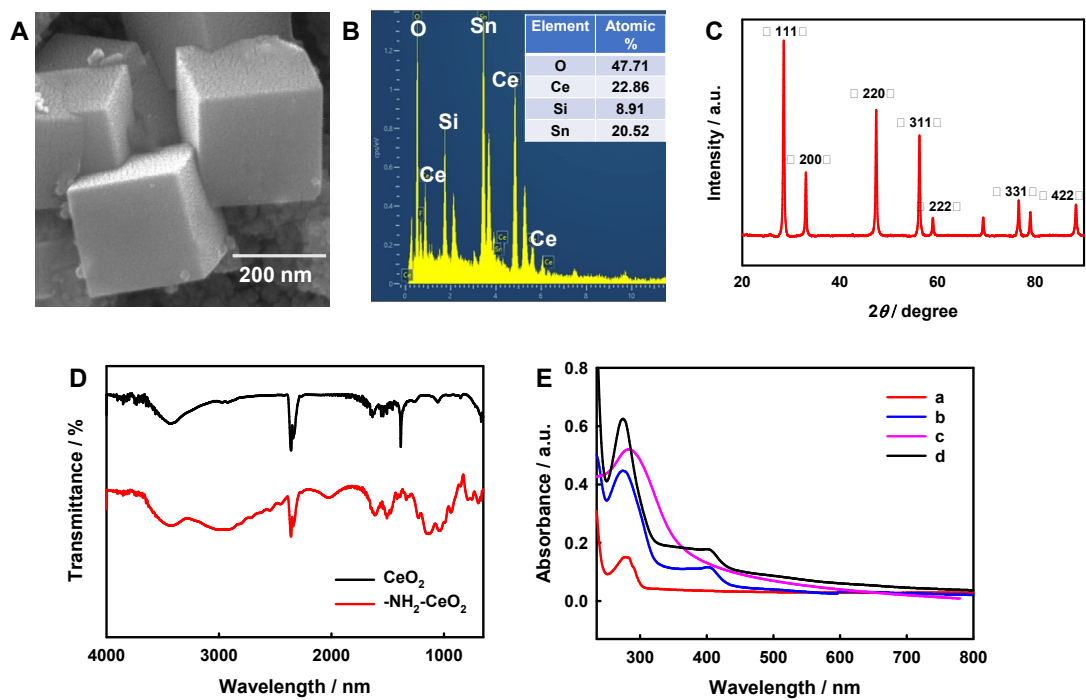

**Fig. S4** (A) SEM image of CeO<sub>2</sub>/FTO, (B) EDS image of CeO<sub>2</sub>/FTO, (C) XRD image of CeO<sub>2</sub>, (D) FT-IR image of CeO<sub>2</sub> and NH<sub>2</sub>-CeO<sub>2</sub>, and (E) UV-vis absorption spectra of (a) Ab<sub>2</sub>, (b) HRP, (c) NH<sub>2</sub>-CeO<sub>2</sub> and (d) HRP-CeO<sub>2</sub>-Ab<sub>2</sub>.



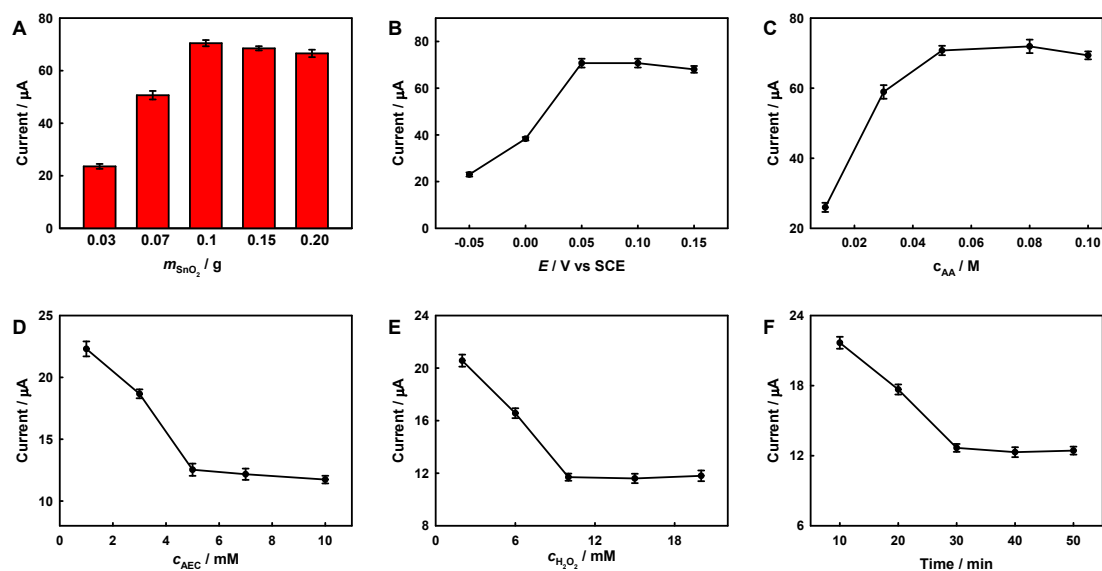

**Fig. S5** Photocurrent responses using different mass of  $\text{SnO}_2$  (A), as well as optimization of bias (B), AA concentration (C), AEC concentration (D),  $\text{H}_2\text{O}_2$  concentration (E), and catalytic precipitation time (F).  $500 \text{ pg mL}^{-1}$  Ag. Here, in order to obtain the best performance of PEC analysis, we have studied the addition amount of  $\text{SnO}_2$  ( $m_{\text{SnO}_2}$ ), bias, AA concentration ( $c_{\text{AA}}$ ), AEC concentration ( $c_{\text{AEC}}$ ),  $\text{H}_2\text{O}_2$  concentration ( $c_{\text{H}_2\text{O}_2}$ ) and catalytic precipitation reaction time ( $t$ ). With the increase of the amount of  $\text{SnO}_2$  added, the photocurrent response is increased from 0.03 g to 0.1 g and then reaches the maximum and tends to be stable. The photocurrent increases with the bias shift from -0.05 V to 0.05 V and reaches the maximum and tends to be stable at 0.05 V or more positive bias. At 0.05 V bias, the background current is also good. When the concentration of AA increased from 0.02 M to 0.05 M, the photocurrent increased significantly. The photocurrent tends to be stable with  $c_{\text{AEC}} \geq 5 \text{ mM}$  and  $c_{\text{H}_2\text{O}_2} \geq 10 \text{ mM}$ , and the catalytic precipitation reaction time reaches a stable level at 30 min. Therefore, the optimized optimal conditions are as follows:  $m_{\text{SnO}_2} = 0.1 \text{ g}$ , bias = 0.05 V vs SCE,  $c_{\text{AA}} = 0.05 \text{ M}$ ,  $c_{\text{AEC}} = 5 \text{ mM}$ ,  $c_{\text{H}_2\text{O}_2} = 10 \text{ mM}$ , and the catalytic precipitation reaction time = 30 min.

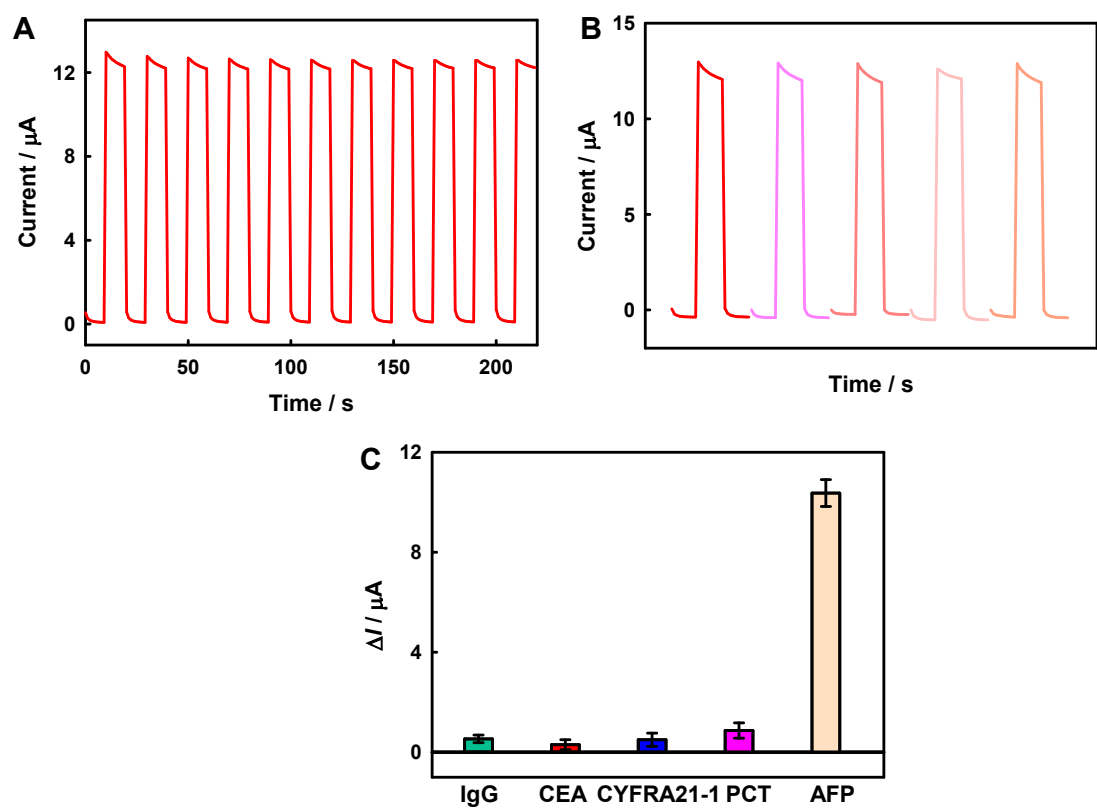

**Fig. S6** (A) Stability and (B) reproducibility of the sandwich immune-electrode assay ( $500 \text{ pg mL}^{-1}$ ) with all interferent candidates each at a concentration of  $50 \text{ ng mL}^{-1}$ ,  $\Delta I = I_0 - I$ , where  $I_0$  is BSA/ $\text{Ab}_1$ /GLD/CS/ $\text{SnO}_2$ / $\text{In}_2\text{S}_3$ /FTO electrode,  $I$  is the photocurrent after treating the BSA/ $\text{Ab}_1$ /GLD/CS/ $\text{SnO}_2$ / $\text{In}_2\text{S}_3$ /FTO electrode with AFP or each of the potential interferents.

**Table S1.** Sensor performance comparison \*

| Technique       | Linear range<br>(ng mL <sup>-1</sup> ) | LOD<br>(pg mL <sup>-1</sup> ) | Ref.      |
|-----------------|----------------------------------------|-------------------------------|-----------|
| ECL             | 0.001-50                               | 3.4                           | 5         |
| ECL             | 0.025-15                               | 12                            | 6         |
| Colorimetry     | 10-1000                                | 2.3                           | 7         |
| Electrochemisty | 0.01-50                                | 0.589                         | 8         |
| Electrochemisty | 0.001-10000                            | 1.09                          | 9         |
| FL              | 0.05-20                                | 17.3                          | 10        |
| PEC             | 0.005-15                               | 1.88                          | 11        |
| PEC             | 0.01-100                               | 7                             | 12        |
| PEC             | 0.001-1000                             | 0.82                          | 13        |
| PEC             | 0.05-100                               | 50                            | 14        |
| PEC             | 0.0005-50                              | 0.15                          | This work |

\* ECL: electrochemiluminescent; FL: Fluorescence.

**Table S2.** Detection of AFP in human serum samples by standard addition method ( $n = 3$ )\*

| Sample No. | Added<br>(ng mL <sup>-1</sup> ) | Measured<br>(ng mL <sup>-1</sup> ) | RSD<br>(%) | Recovery<br>(%) |
|------------|---------------------------------|------------------------------------|------------|-----------------|
| 1          | 1.00                            | 0.920                              | 3.3        | 92.0            |
| 2          | 0.100                           | 0.0951                             | 5.8        | 95.1            |
| 3          | 0.0100                          | 0.0106                             | 7.6        | 106             |

\*Here, the healthy human serum samples were donated by Hunan Normal University Hospital and they are from male and female aged 18~23 with good physical quality. The samples were centrifuged at 5000 rpm for 10 min and diluted 20 times with 0.01 M PBS (pH 7.40), and AFP standard solution was added to 3 tubes of 1 mL diluted serum to make it final concentrations at 1.00 ng mL<sup>-1</sup>, 0.100 ng mL<sup>-1</sup>, and 0.0100 ng mL<sup>-1</sup>. The PEC test was carried out under the optimal experimental conditions.

## References

1. S. Zhang, H. J. Zheng, Y. P. Sun, F. Li, T. T. Li, X. Q. Liu, Y. M. Zhou, W. W. Chen and H. X. Ju, *Biosensors & Bioelectronics*, 2020, **167**.
2. E. Gu, X. Lin, X. Tang, G. J. Matt, A. Osvet, Y. Hou, S. Jäger, C. Xie, A. Karl, R. Hock and C. J. Brabec, *J. Mater. Chem. C.*, 2018, **6**, 7642-7651.
3. B. Pejova, D. Nesheva, Z. Aneva and A. Petrova, *J. Phys. Chem. C*, 2011, **115**, 37-46.
4. J. T. Shen, L. Qian, J. L. Huang, Y. F. Guo and Z. Z. Zhang, *Separation and Purification Technology*, 2021, **275**.
5. M. S. Khan, H. Ameer and Y. Chi, *Sens. Actuators, B.*, 2021, **337**, 129761.
6. J. Li, T. Gao, S. Gu, J. Zhi, J. Yang and G. Li, *Biosens. Bioelectron.*, 2017, **87**, 352-357.
7. R. Ren, G. Cai, Z. Yu, Y. Zeng and D. Tang, *Anal. Chem.*, 2018, **90**, 11099-11105.
8. M. Wang, M. Jiang, X. Liao, X. Wang, W. Lai, P. Li, J. Li, C. Hong and Y. Qi, *Anal. Methods.*, 2022, **14**, 2703-2713.
9. H. Wu, G. Zhang and X. Yang, *TALANTA.*, 2023, **259**, 124492.
10. Z. Lin, M. Li, S. Lv, K. Zhang, M. Lu and D. Tang, *J. Mater. Chem. B.*, 2017, **5**, 8506-8513.
11. X. Qin, Y. Pan, J. Zhang, J. Shen and C. Li, *TALANTA.*, 2023, **253**, 123684.
12. J. Li, D. Liu, D. Zhou, L. Shao, X. Chen and H. Song, *TALANTA.*, 2021, **225**, 122074.
13. X. Tang, H. Wang, X. Zhang, C. Mao, L. Wu and L. Zhao, *BIOELECTROCHEMISTRY*, 2023, **150**, 108351.
14. Y. Wu, H. Su, J. Yang, Z. Wang, D. Li, H. Sun, X. Guo and S. Yin, *J. Colloid Interface Sci.*, 2020, **580**, 583-591.
